# Supplementary material for: The association between non-alcoholic fatty liver disease (NAFLD) and advanced fibrosis with blood selenium level based on the NHANES 2017-2018
Source: PubMed Central journal article supplement (PMC9455329; doi:10.1080/07853890.2022.2110277), 2022-08-17
Supplement: IANN_A_2110277_SM8767.pdf [file IANN_A_2110277_SM8767.pdf]

## Appendices

**Supplementary table 1: Association between blood selenium level and NAFLD diagnosed by ALT&AST and FLI.**

|                                       | NAFLD diagnosed by AST&ALT |                      |                      | NAFLD diagnosed by FLI |                      |                      |
|---------------------------------------|----------------------------|----------------------|----------------------|------------------------|----------------------|----------------------|
|                                       | Model 1<br>β (95 CI)       | Model 2<br>β (95 CI) | Model 3<br>β (95 CI) | Model 1<br>β (95 CI)   | Model 2<br>β (95 CI) | Model 3<br>β (95 CI) |
| Blood selenium level (ug/L, quartile) |                            |                      |                      |                        |                      |                      |
| Q1                                    | Reference                  | Reference            | Reference            | Reference              | Reference            | Reference            |
| Q2                                    | 1.23 (0.89, 1.68)          | 1.16 (0.85, 1.60)    | 1.15 (0.83, 1.59)    | 1.07 (0.83, 1.40)      | 1.09 (0.83, 1.42)    | 0.88 (1.52, 1.47)    |
| Q3                                    | 1.42 (1.05, 1.93)          | 1.36 (0.99, 1.85)    | 1.33 (0.97, 1.82)    | 1.38 (1.06, 1.80)      | 1.38 (1.06, 1.81)    | 1.65 (1.01, 2.72)    |
| Q4                                    | 1.45 (1.07, 1.97)          | 1.35 (0.99, 1.85)    | 1.30 (0.95, 1.79)    | 1.45 (1.11, 1.88)      | 1.48 (1.13, 1.94)    | 1.65 (1.00, 2.72)    |
| P for trend                           | 0.01                       | 0.04                 | 0.09                 | <0.01                  | <0.01                | 0.01                 |

Model 1: no covariates were adjusted. Model 2: age, gender and race/ethnicity, education level were adjusted. Model 3: age, gender, race/ethnicity, BMI, waist circumference, smoking status, physical activity, dietary selenium intake and diabetes were adjusted. NAFLD: Non-alcoholic fatty liver disease; ALT: Alanine aminotransferase; AST: Aspartate aminotransferase; FLI: Fatty liver index

1  
2  
3  
4  
5  
6  
7  
8  
9  
10  
11  
12  
13  
14  
15  
16  
17  
18  
19  
20  
21  
22  
23  
24  
25  
26  
27  
28  
29  
30  
31  
32  
33  
34  
35  
36  
37  
38  
39  
40  
41  
42  
43  
44  
45  
46

**Supplementary table 2: Association between blood selenium level and advanced liver fibrosis diagnosed by FIB-4 and BARD.**

|                                       | FIB-4                |                      |                      | BARD                 |                      |                      |
|---------------------------------------|----------------------|----------------------|----------------------|----------------------|----------------------|----------------------|
|                                       | Model 1<br>β (95 CI) | Model 2<br>β (95 CI) | Model 3<br>β (95 CI) | Model 1<br>β (95 CI) | Model 2<br>β (95 CI) | Model 3<br>β (95 CI) |
| Blood selenium level (ug/L, quartile) |                      |                      |                      |                      |                      |                      |
| Q1                                    | Reference            | Reference            | Reference            | Reference            | Reference            | Reference            |
| Q2                                    | 0.45 (0.21, 0.95)    | 0.51 (0.24, 1.11)    | 0.46 (0.21, 1.00)    | 0.78 (0.65, 0.94)    | 0.83 (0.69, 1.00)    | 0.71 (0.57, 0.89)    |
| Q3                                    | 0.54 (0.27, 1.10)    | 0.62 (0.30, 1.30)    | 0.59 (0.28, 1.24)    | 0.71 (0.59, 0.85)    | 0.78 (0.64, 0.94)    | 0.62 (0.49, 0.77)    |
| Q4                                    | 0.31 (0.13, 0.74)    | 0.35 (0.15, 0.84)    | 0.32 (0.13, 0.77)    | 0.63 (0.53, 0.76)    | 0.73 (0.60, 0.88)    | 0.59 (0.47, 0.73)    |
| P for trend                           | <0.01                | 0.02                 | 0.01                 | <0.01                | <0.01                | <0.01                |

Model 1: no covariates were adjusted. Model 2: age, gender and race/ethnicity, education level were adjusted. Model 3: age, gender, race/ethnicity, BMI, waist circumference, smoking status, physical activity, dietary selenium intake and diabetes were adjusted. FIB-4: Fibrosis-4 index; BARD: Body mass index, AST/ALT Ratio, Diabetes score
